# Supplementary material
Source: Research Square preprint supplement (doi:10.21203/rs.3.rs-9957885/v1)
Supplement: Supplementary file 1 [file 3ca1622083889ad6965e6fc0.docx]

**APPENDIX**

**List of Tables**

**Table 1: Socio-Demographic Characteristics of the Respondents (N = 357)**

| **Items** | **No. of Respondents** | **Percentage (%)** |
| --- | --- | --- |
| **Gender** |  |  |
| Male | 168 | 47.1 |
| Female | 189 | 52.9 |
| **Total** | **357** | **100.0** |
| **Age** |  |  |
| 15–19 | 42 | 11.8 |
| 20–24 | 238 | 66.7 |
| 25–29 | 62 | 17.4 |
| 30+ | 15 | 4.2 |
| **Total** | **357** | **100.0** |
| **University** |  |  |
| UNIZIK | 118 | 33.1 |
| UNN | 200 | 56.0 |
| FUTO | 39 | 10.9 |
| **Total** | **357** | **100.0** |
| **Level** |  |  |
| 200L | 95 | 26.6 |
| 300L | 118 | 33.1 |
| 400L | 104 | 29.1 |
| 500L | 40 | 11.2 |
| **Total** | **357** | **100.0** |
| **Parents’ Highest Education** |  |  |
| Primary | 31 | 8.7 |
| Secondary | 129 | 36.1 |
| Tertiary | 153 | 42.9 |
| Postgraduate | 44 | 12.3 |
| **Total** | **357** | **100.0** |
| **Family Income Level** |  |  |
| Low | 112 | 31.4 |
| Average | 187 | 52.4 |
| High | 58 | 16.2 |
| **Total** | **357** | **100.0** |

Source: Field Survey (2025)

**Table 2: Socioeconomic Factors Influencing Entrepreneurial Attitudes (N = 357)**

| **Items** | **SD (1)** | **D (2)** | **U (3)** | **A (4)** | **SA (5)** |  | **Remark** |
| --- | --- | --- | --- | --- | --- | --- | --- |
| My family encourages me to start a business. | 25 | 41 | 60 | 145 | 86 | 3.82 | **Accepted** |
| My parents’ occupation motivates me to consider entrepreneurship. | 40 | 55 | 92 | 118 | 52 | 3.29 | **Rejected** |
| My family’s financial status gives me confidence to start a business. | 65 | 78 | 85 | 95 | 34 | 2.87 | **Rejected** |
| I believe entrepreneurship can provide financial stability for my family. | 15 | 30 | 45 | 167 | 100 | 3.96 | **Accepted** |
| Lack of financial support limits my entrepreneurial interest. | 20 | 52 | 58 | 142 | 85 | 3.76 | **Accepted** |
| Access to business capital influences my willingness to start a venture. | 18 | 35 | 42 | 160 | 102 | 4.02 | **Accepted** |
| My socioeconomic background shapes my attitude toward entrepreneurship. | 22 | 38 | 65 | 150 | 82 | 3.81 | **Accepted** |
| **Total (Average)** |  |  |  |  |  | **3.65** |  |
| **Standard Deviation** |  |  |  |  |  | **0.41** |  |

**Table 3: Institutional Factors Influencing Entrepreneurial Attitudes (N = 357)**

|  | **SD (1)** | **D (2)** | **U (3)** | **A (4)** | **SA (5)** |  | **Remark** |
| --- | --- | --- | --- | --- | --- | --- | --- |
| My university provides sufficient entrepreneurship education. | 102 | 115 | 75 | 50 | 15 | 2.33 | **Rejected** |
| Lecturers encourage students to be innovative and entrepreneurial. | 45 | 88 | 95 | 105 | 24 | 2.96 | **Rejected** |
| The radiography curriculum includes relevant entrepreneurship topics. | 90 | 110 | 82 | 60 | 15 | 2.45 | **Rejected** |
| My university environment supports creative thinking. | 38 | 75 | 100 | 120 | 24 | 3.03 | **Rejected** |
| Practical training in school enhances my entrepreneurial mindset. | 30 | 52 | 65 | 150 | 60 | 3.51 | **Accepted** |
| I have access to entrepreneurship seminars or workshops in my school. | 85 | 120 | 80 | 60 | 12 | 2.42 | **Rejected** |
| The institution provides mentorship opportunities for aspiring entrepreneurs. | 110 | 125 | 70 | 45 | 7 | 2.21 | **Rejected** |
| **Total (Average)** |  |  |  |  |  | **2.70** |  |
| **Standard Deviation** |  |  |  |  |  | **0.44** |  |

**Table 4: Entrepreneurial Attitudes of Radiography Students (N = 357)**

| **Items** | **SD (1)** | **D (2)** | **U (3)** | **A (4)** | **SA (5)** |  | **Remark** |
| --- | --- | --- | --- | --- | --- | --- | --- |
| I am willing to start my own radiography-related business after graduation. | 20 | 35 | 70 | 145 | 87 | 3.80 | **Accepted** |
| I enjoy identifying opportunities within the medical imaging field. | 25 | 40 | 65 | 150 | 77 | 3.75 | **Accepted** |
| I feel confident in my ability to run a business successfully. | 50 | 75 | 90 | 110 | 32 | 3.06 | **Rejected** |
| I prefer to be self-employed rather than depend on a salaried job alone. | 55 | 80 | 85 | 100 | 37 | 3.05 | **Rejected** |
| I am motivated to create innovative solutions in radiography practice. | 15 | 30 | 55 | 170 | 87 | 3.94 | **Accepted** |
| Entrepreneurship is an important career option for me. | 22 | 38 | 60 | 155 | 82 | 3.83 | **Accepted** |
| I plan to pursue entrepreneurial training after graduation. | 18 | 32 | 58 | 160 | 89 | 3.94 | **Accepted** |
| **Total (Average)** |  |  |  |  |  | **3.62** |  |
| **Standard Deviation** |  |  |  |  |  | **0.41** |  |

**Hypotheses Tables**

**H01:**  Socioeconomic factors do not significantly influence the entrepreneurial attitudes of radiography students in South-Eastern Nigeria.

**Table 5: Summary of the Analysis Showing the Influence of Socioeconomic Factors on Entrepreneurial Attitudes**

|  | Socioeconomic Factors | Entrepreneurial Attitudes |
| --- | --- | --- |
| **Socioeconomic Factors** | Correlation Coefficient | 1 |
|  | Sig. (2-tailed) |  |
|  | N | 357 |
| **Entrepreneurial Attitudes** | Correlation Coefficient | **.612** |
|  | Sig. (2-tailed) | **.000** |
|  | N | 357 |

Source: Field Survey Data 2025, SPSS Output

**H02:**  Institutional factors do not significantly affect the entrepreneurial attitudes of radiography students.

**Table 6: Summary of the Analysis Showing the Influence of Institutional Factors on Entrepreneurial Attitudes**

|  | Institutional Factors | Entrepreneurial Attitudes |
| --- | --- | --- |
| **Institutional Factors** | Correlation Coefficient | 1 |
|  | Sig. (2-tailed) |  |
|  | N | 357 |
| **Entrepreneurial Attitudes** | Correlation Coefficient | **.234** |
|  | Sig. (2-tailed) | **.000** |
|  | N | 357 |

Source: Field Survey Data 2025, SPSS Output

**H03:**  There is no significant relationship between socioeconomic and institutional factors in shaping entrepreneurial attitudes among radiography students.

**Table 4: Summary of the Analysis Showing the Relationship Between Socioeconomic and Institutional Factors**

|  | Socioeconomic Factors | Institutional Factors |
| --- | --- | --- |
| **Socioeconomic Factors** | Correlation Coefficient | 1 |
|  | Sig. (2-tailed) |  |
|  | N | 357 |
| **Institutional Factors** | Correlation Coefficient | **.085** |
|  | Sig. (2-tailed) | **.108** |
|  | N | 357 |

**Source:** Field Survey Data 2025, SPSS Output
